# Supplementary material for: Trends in Infectious Keratitis in Taiwan: An Update on Predisposing Factors, Microbiological and Antibiotic Susceptibility Patterns
Source: Preprints.org preprint supplement (doi:10.20944/preprints202207.0046.v1), 2022-07-04
Supplement: Supplementary file 2 [file supplementary]

Table S1. Susceptibility of methicillin-resistant *Staphylococcus aureus* (MRSA) isolates to the tested antibiotics.

|  | 2004-2007 | 2008-2011 | 2012-2015 | 2016-2019 | Total |  |
| --- | --- | --- | --- | --- | --- | --- |
| Antibiotics | n (%) | n (%) | n (%) | n (%) | n (%) | P value* |
| Clindamycin | 19 (5.3) | 25 (16.0) | 19 (21.1) | 19 (36.8) | 82 (19.5) | 0.015 |
| Erythromycin | 19 (0.0) | 25 (4.0) | 19 (21.1) | 19 (31.6) | 82 (13.4) | 0.001 |
| Fusidic acid | N/A | 22 (90.9) | 18 (100.0) | 19 (100.0) | 59 (96.6) | 0.235 |
| Linezolid | N/A | 14 (100.0) | 14 (100.0) | 14 (100.0) | 42 (100.0) |  |
| Smx-tmp | 19 (79.0) | 25 (76.0) | 19 (84.2) | 19 (100.0) | 82 (100.0) | 0.053 |
| Teicoplanin | 19 (100.0) | 25 (100.0) | 19 (100.0) | 19 (100.0) | 82 (100.0) |  |
| Tigecycline | N/A | 25 (100.0) | 18 (100.0) | 19 (100.0) | 62 (100.0) |  |
| Vancomycin | 16 (100.0) | 25 (100.0) | 19 (100.0) | 19 (100.0) | 79 (100.0) |  |
| * Cochran-Armitage trend test | | | | | | |
